## Personalized Virus Load Curves of SARS-CoV-2 Infection.

Thomas Hillen, Carlos Contreras, and Jay M. Newby.

This manuscript has been withdrawn due to submission errors. Therefore, the authors do not wish this work to be cited as a reference. Please see and cite for reference the manuscript posted on medRxiv <https://doi.org/10.1101/2021.01.21.21250268> If you have any questions, please contact the corresponding author.
